# Supplementary material
Source: Royal Society of Chemistry journal article supplement (doi:10.1039/d6mh00005c)
Supplement: d6mh00005c1.pdf [file d6mh00005c1.pdf]

Supplementary Information

## **Quantum dots with photopolymerisable ligands for green-solvent direct photolithography**

Jin Ho Keum,<sup>a</sup> Yongkook Kang,<sup>a</sup> Se Young Park<sup>a</sup>, Hyeokjun Kim<sup>a</sup>, SeungHwan Roh<sup>a</sup>, Yonghyun Jo,<sup>a</sup> and Moon Sung Kang<sup>\*a</sup>

<sup>a</sup>Department of Chemical and Biomolecular Engineering, Sogang University, Seoul 04107, Republic of Korea.

<sup>b</sup>Institute of Emergent Materials, Sogang University, Seoul 04107, Republic of Korea.

E-mail: [kangms@sogang.ac.kr](mailto:kangms@sogang.ac.kr)

**Table S1** Boiling point, molar volume and HSPs for the OA-QDs and solvents.

|    | Materials            | Boiling point<br>°C | Molar volume<br>mL/mol | $\delta_D$<br>MPa <sup>0.5</sup> | $\delta_P$<br>MPa <sup>0.5</sup> | $\delta_H$<br>MPa <sup>0.5</sup> | $R_a$<br>- | RED<br>- |
|----|----------------------|---------------------|------------------------|----------------------------------|----------------------------------|----------------------------------|------------|----------|
| 0  | OA-QD                |                     |                        | 17.6                             | 1.3                              | 3.4                              | 6.5        |          |
| 1  | Dichloromethane      | 39.6                | 171.2                  | 18.2                             | 6.3                              | 6.1                              | 5.813      | 0.888    |
| 2  | Cyclohexanone        | 155.6               | 104.2                  | 17.8                             | 8.4                              | 5.1                              | 7.291      | 1.113    |
| 3  | 1,2,-dichlorobenzene | 180.5               | 113                    | 19.2                             | 6.3                              | 3.3                              | 5.955      | 0.909    |
| 4  | p-xylene             | 138.0               | 123.9                  | 17.6                             | 1                                | 3.1                              | 0.4359     | 0.067    |
| 5  | tetrahydrofuran      | 66.0                | 81.9                   | 16.8                             | 5.7                              | 8                                | 6.544      | 0.999    |
| 6  | nitromethane         | 100.0               | 54.3                   | 15.8                             | 18.8                             | 5.1                              | 17.898     | 2.733    |
| 7  | diethylene glycol    | 245.0               | 94.9                   | 16.6                             | 12                               | 20.7                             | 20.443     | 3.122    |
| 8  | ethanolamine         | 170.0               | 59.8                   | 17                               | 15.5                             | 21.2                             | 22.803     | 3.482    |
| 9  | toluene              | 110.6               | 106.6                  | 18                               | 1.4                              | 2                                | 1.628      | 0.249    |
| 11 | chloroform           | 61.2                | 80.5                   | 17.8                             | 3.1                              | 5.7                              | 2.968      | 0.453    |
| 12 | chlorobenzene        | 132.0               | 102.1                  | 19                               | 4.3                              | 2                                | 4.357      | 0.665    |
| 13 | hexane               | 68.7                | 131.4                  | 14.9                             | 0                                | 0                                | 6.428      | 0.982    |
| 14 | n-octane             | 125.6               | 163.5                  | 15.5                             | 0                                | 0                                | 5.478      | 0.837    |
| 15 | acetone              | 56.1                | 73.8                   | 15.5                             | 10.4                             | 7                                | 10.597     | 1.618    |
| 16 | ethanol              | 78.2                | 58.5                   | 15.8                             | 8.8                              | 19.4                             | 18.0337    | 2.754    |
| 17 | isopropyl alcohol    | 82.6                | 76.8                   | 15.8                             | 6.1                              | 16.4                             | 14.317     | 2.186    |
| 18 | benzene              | 80.1                | 89.4                   | 18.4                             | 0                                | 2                                | 2.548      | 0.389    |
| 19 | acetonitrile         | 81.6                | 52.6                   | 15.3                             | 18                               | 6.1                              | 17.480     | 2.669    |
| 20 | diethyl ether        | 34.6                | 104.8                  | 14.5                             | 2.9                              | 5.1                              | 6.544      | 0.999    |
| 21 | ethyl acetate        | 77.1                | 98.5                   | 15.8                             | 5.3                              | 7.2                              | 6.540      | 0.999    |
| 22 | PGMEA                | 152.0               | 136.2                  | 15.6                             | 5.6                              | 9.8                              | 8.655      | 1.322    |
| 23 | DGMEA                | 166.2               | 174.3                  | 16.2                             | 5.1                              | 9.2                              | 7.456      | 1.14     |
| 24 | TGME                 | 204.0               | 160.0                  | 16.2                             | 7.6                              | 12.5                             | 11.405     | 1.74     |
| 25 | PGME                 | 112.0               | 98.4                   | 15.6                             | 7.2                              | 13.6                             | 12.429     | 1.90     |
| 26 | methyl benzoate      | 199.0               | 125.1                  | 18.9                             | 8.2                              | 4.7                              | 7.492      | 1.14     |

**Table S2** Boiling point, molar volume and HSPs for the MMES-QDs and solvents.

|    | Materials           | Boiling point<br>°C | Molar volume<br>mL/mol | $\delta_D$<br>MPa <sup>0.5</sup> | $\delta_P$<br>MPa <sup>0.5</sup> | $\delta_H$<br>MPa <sup>0.5</sup> | $R_a$<br>- | RED<br>- |
|----|---------------------|---------------------|------------------------|----------------------------------|----------------------------------|----------------------------------|------------|----------|
| 0  | MMES-QD             |                     |                        | 18.0                             | 5.8                              | 7.4                              | 8.0        |          |
| 1  | Dichloromethane     | 39.6                | 171.2                  | 18.2                             | 6.3                              | 6.1                              |            |          |
| 2  | Cyclohexanone       | 155.6               | 104.2                  | 17.8                             | 8.4                              | 5.1                              | 3.530      | 0.442    |
| 3  | 1,2-dichlorobenzene | 180.5               | 113                    | 19.2                             | 6.3                              | 3.3                              | 4.777      | 0.598    |
| 4  | p-xylene            | 138.0               | 123.9                  | 17.6                             | 1                                | 3.1                              | 6.525      | 0.817    |
| 5  | tetrahydrofuran     | 66.0                | 81.9                   | 16.8                             | 5.7                              | 8                                | 2.531      | 0.317    |
| 6  | nitromethane        | 100.0               | 54.3                   | 15.8                             | 18.8                             | 5.1                              | 13.946     | 1.747    |
| 7  | diethylene glycol   | 245.0               | 94.9                   | 16.6                             | 12                               | 20.7                             | 14.919     | 1.868    |
| 8  | ethanolamine        | 170.0               | 59.8                   | 17                               | 15.5                             | 21.2                             | 16.965     | 2.125    |
| 9  | toluene             | 110.6               | 106.6                  | 18                               | 1.4                              | 2                                | 6.993      | 0.876    |
| 11 | chloroform          | 61.2                | 80.5                   | 17.8                             | 3.1                              | 5.7                              | 3.242      | 0.406    |
| 12 | chlorobenzene       | 132.0               | 102.1                  | 19                               | 4.3                              | 2                                | 5.962      | 0.747    |
| 13 | hexane              | 68.7                | 131.4                  | 14.9                             | 0                                | 0                                | 11.322     | 1.418    |
| 14 | n-octane            | 125.6               | 163.5                  | 15.5                             | 0                                | 0                                | 10.704     | 1.341    |
| 15 | acetone             | 56.1                | 73.8                   | 15.5                             | 10.4                             | 7                                | 6.859      | 0.859    |
| 16 | ethanol             | 78.2                | 58.5                   | 15.8                             | 8.8                              | 19.4                             | 13.117     | 1.643    |
| 17 | isopropyl alcohol   | 82.6                | 76.8                   | 15.8                             | 6.1                              | 16.4                             | 10.018     | 1.255    |
| 18 | benzene             | 80.1                | 89.4                   | 18.4                             | 0                                | 2                                | 7.982      | 1.000    |
| 19 | acetonitrile        | 81.6                | 52.6                   | 15.3                             | 18                               | 6.1                              | 13.438     | 1.683    |
| 20 | diethyl ether       | 34.6                | 104.8                  | 14.5                             | 2.9                              | 5.1                              | 7.986      | 1.000    |
| 21 | ethyl acetate       | 77.1                | 98.5                   | 15.8                             | 5.3                              | 7.2                              | 4.500      | 0.564    |
| 22 | PGMEA               | 152.0               | 136.2                  | 15.6                             | 5.6                              | 9.8                              | 5.412      | 0.678    |
| 23 | DGMEA               | 166.2               | 174.3                  | 16.2                             | 5.1                              | 9.2                              | 4.127      | 0.52     |
| 24 | TGME                | 204.0               | 160.0                  | 16.2                             | 7.6                              | 12.5                             | 6.505      | 0.81     |
| 25 | PGME                | 112.0               | 98.4                   | 15.6                             | 7.2                              | 13.6                             | 7.976      | 1.00     |
| 26 | methyl benzoate     | 199.0               | 125.1                  | 18.9                             | 8.2                              | 4.7                              | 4.035      | 0.51     |

**Table S3** Boiling point, molar volume and HSPs for the N-BP ligand and solvents.

|    | Materials           | Boiling point<br>°C | Molar volume<br>mL/mol | $\delta_D$<br>MPa <sup>0.5</sup> | $\delta_P$<br>MPa <sup>0.5</sup> | $\delta_H$<br>MPa <sup>0.5</sup> | $R_a$<br>- | RED<br>- |
|----|---------------------|---------------------|------------------------|----------------------------------|----------------------------------|----------------------------------|------------|----------|
| 0  | N-BP                |                     |                        | 18.0                             | 9.8                              | 11.7                             | 11.3       |          |
| 1  | Dichloromethane     | 39.6                | 171.2                  | 18.2                             | 6.3                              | 6.1                              | 6.592      | 0.584    |
| 2  | Cyclohexanone       | 155.6               | 104.2                  | 17.8                             | 8.4                              | 5.1                              | 6.734      | 0.596    |
| 3  | 1,2-dichlorobenzene | 180.5               | 113                    | 19.2                             | 6.3                              | 3.3                              | 9.365      | 0.829    |
| 4  | p-xylene            | 138.0               | 123.9                  | 17.6                             | 1                                | 3.1                              | 12.326     | 1.091    |
| 5  | tetrahydrofuran     | 66.0                | 81.9                   | 16.8                             | 5.7                              | 8                                | 6.049      | 0.536    |
| 6  | nitromethane        | 100.0               | 54.3                   | 15.8                             | 18.8                             | 5.1                              | 11.995     | 1.062    |
| 7  | diethylene glycol   | 245.0               | 94.9                   | 16.6                             | 12                               | 20.7                             | 9.733      | 0.862    |
| 8  | ethanolamine        | 170.0               | 59.8                   | 17                               | 15.5                             | 21.2                             | 11.293     | 1.000    |
| 9  | toluene             | 110.6               | 106.6                  | 18                               | 1.4                              | 2                                | 12.818     | 1.135    |
| 11 | chloroform          | 61.2                | 80.5                   | 17.8                             | 3.1                              | 5.7                              | 8.998      | 0.797    |
| 12 | chlorobenzene       | 132.0               | 102.1                  | 19                               | 4.3                              | 2                                | 11.293     | 1.000    |
| 13 | hexane              | 68.7                | 131.4                  | 14.9                             | 0                                | 0                                | 16.493     | 1.460    |
| 14 | n-octane            | 125.6               | 163.5                  | 15.5                             | 0                                | 0                                | 16.070     | 1.423    |
| 15 | acetone             | 56.1                | 73.8                   | 15.5                             | 10.4                             | 7                                | 6.927      | 0.613    |
| 16 | ethanol             | 78.2                | 58.5                   | 15.8                             | 8.8                              | 19.4                             | 9.000      | 0.797    |
| 17 | isopropyl alcohol   | 82.6                | 76.8                   | 15.8                             | 6.1                              | 16.4                             | 7.509      | 0.665    |
| 18 | benzene             | 80.1                | 89.4                   | 18.4                             | 0                                | 2                                | 13.797     | 1.222    |
| 19 | acetonitrile        | 81.6                | 52.6                   | 15.3                             | 18                               | 6.1                              | 11.314     | 1.002    |
| 20 | diethyl ether       | 34.6                | 104.8                  | 14.5                             | 2.9                              | 5.1                              | 11.883     | 1.052    |
| 21 | ethyl acetate       | 77.1                | 98.5                   | 15.8                             | 5.3                              | 7.2                              | 7.778      | 0.689    |
| 22 | PGMEA               | 152.0               | 136.2                  | 15.6                             | 5.6                              | 9.8                              | 6.721      | 0.595    |
| 23 | DGMEA               | 166.2               | 174.3                  | 16.2                             | 5.1                              | 9.2                              | 6.477      | 0.57     |
| 24 | TGME                | 204.0               | 160.0                  | 16.2                             | 7.6                              | 12.5                             | 4.384      | 0.39     |
| 25 | PGME                | 112.0               | 98.4                   | 15.6                             | 7.2                              | 13.6                             | 5.873      | 0.52     |
| 26 | methyl benzoate     | 199.0               | 125.1                  | 18.9                             | 8.2                              | 4.7                              | 7.353      | 0.65     |

**Table S4** Calculated RED values for PGMEA, DGMEA, TGME and PGME with respect to the OA-QDs, MMES-QDs and N-BP.

|       | $\delta_D$ | $\delta_P$ | $\delta_H$ | $R_0$ | RED  |
|-------|------------|------------|------------|-------|------|
| OA-QD | 17.6       | 1.3        | 3.4        | 6.5   |      |
| PGMEA | 15.6       | 5.6        | 9.8        |       | 1.34 |
| DGMEA | 16.2       | 5.1        | 9.2        |       | 1.15 |
| TGME  | 16.2       | 7.6        | 12.5       |       | 1.76 |
| PGME  | 15.6       | 7.2        | 13.6       |       | 1.91 |

|         | $\delta_D$ | $\delta_P$ | $\delta_H$ | $R_0$ | RED  |
|---------|------------|------------|------------|-------|------|
| MMES-QD | 18         | 5.8        | 7.4        | 8     |      |
| PGMEA   | 15.6       | 5.6        | 9.8        |       | 0.67 |
| DGMEA   | 16.2       | 5.1        | 9.2        |       | 0.51 |
| TGME    | 16.2       | 7.6        | 12.5       |       | 0.81 |
| PGME    | 15.6       | 7.2        | 13.6       |       | 1.00 |

|       | $\delta_D$ | $\delta_P$ | $\delta_H$ | $R_0$ | RED  |
|-------|------------|------------|------------|-------|------|
| N-BP  | 18         | 9.8        | 11.7       | 11.3  |      |
| PGMEA | 15.6       | 5.6        | 9.8        |       | 0.83 |
| DGMEA | 16.2       | 5.1        | 9.2        |       | 0.80 |
| TGME  | 16.2       | 7.6        | 12.5       |       | 0.54 |
| PGME  | 15.6       | 7.2        | 13.6       |       | 0.72 |

**Table S5** Summary of QD patterning strategies using green solvents.

| QD layer composition                                                                                   | Processing solvent                                                                                                    | Applications                                                                                   | Ref              |
|--------------------------------------------------------------------------------------------------------|-----------------------------------------------------------------------------------------------------------------------|------------------------------------------------------------------------------------------------|------------------|
| QD with monomeric dispersing ligand(N-BP) & photoinitiating ligand (MMES)                              | propylene glycol monomethyl ether acetate                                                                             | QD light-emitting diode (electroluminescence)                                                  | <b>This work</b> |
| QD, PMMA, negative PR (SU-8)                                                                           | $\gamma$ -butyrolactone                                                                                               | QD color conversion layer (photoluminescence)                                                  | 1                |
| QD, negative PR                                                                                        | N/A                                                                                                                   | QD color conversion layer (photoluminescence)                                                  | 2                |
| QD, negative PR                                                                                        | N/A                                                                                                                   | QD color conversion layer (photoluminescence)                                                  | 3                |
| QD, dispersant (DisperBYK), acrylate oligomer (PO94F)                                                  | propylene glycol monomethyl ether acetate                                                                             | QD color conversion layer (photoluminescence)                                                  | 4                |
| Epoxy-silica coated QD, negative PR (SU-8)                                                             | $\gamma$ -butyrolactone, propylene glycol monomethyl ether acetate                                                    | QD color conversion layer (photoluminescence)                                                  | 5                |
| QD, acrylic oligomer (N/A), monomer (N/A), photoinitiator (N/A)                                        | N/A                                                                                                                   | QD color conversion layer (photoluminescence)                                                  | 6                |
| SiO <sub>2</sub> -coated QD, dispersant (N/A), negative PR (SU-8)                                      | propylene glycol monomethyl ether acetate, cyclopentanone, $\gamma$ -butyrolactone                                    | QD color conversion layer (photoluminescence)                                                  | 7                |
| QD, acrylate, photoinitiator (1-hydroxycyclohexylphenyl ketone)                                        | dipentaerythritol penta-acrylate, dipentaerythritol hexa-acrylate, pentaerythritol triacrylate, 4-acryl-oylmorpholine | QD color conversion layer (photoluminescence)                                                  | 8                |
| QD, acrylate, photoinitiator (1-hydroxycyclohexylphenyl ketone)                                        | penta-acrylate, dipentaerythritol hexa-acrylate, pentaerythritol triacrylate, 4-acryl-oylmorpholine                   | QD color conversion layer (photoluminescence)                                                  | 9                |
| QD with dispersing ligand (MMES), negative PR                                                          | propylene glycol monomethyl ether acetate                                                                             | QD color conversion layer (photoluminescence)                                                  | 10               |
| QD with dispersing ligand (MMES), acrylate resin (bisphenol A ethoxylated diacrylate, Irgacure Oxo-02) | propylene glycol monomethyl ether acetate                                                                             | QD color conversion layer (photoluminescence)<br>QD light-emitting diode (electroluminescence) | 11               |
| QD with photosensitizing ligands (MMPE or MEMA)                                                        | propylene glycol monomethyl ether acetate                                                                             | QD light-emitting diode (electroluminescence)                                                  | 12               |

**Table S6** Summary of previous QLEDs prepared using green solvents. The solvents in bold are non-green solvents that were used in preparing these devices.

|     | Functional layers          | Processing Solvents                       | Max EQE | Ref              |
|-----|----------------------------|-------------------------------------------|---------|------------------|
| HTL | TFB                        | cyclopentanone                            |         |                  |
| EML | In/ZnSe/ZnS                | propylene glycol monomethyl ether acetate | 1.5%    | <b>This work</b> |
| ETL | ZnMgO NP                   | ethanol                                   |         |                  |
| HTL | Poly-TPD                   | chlorobenzene                             |         |                  |
| EML | CdSe/ZnS QD (Green)        | octane, cyclohexylbenzene                 | 2.4%    | 13               |
| ETL | ZnMgO NP                   | ethanol                                   |         |                  |
| HTL | PVK                        | chlorobenzene                             |         |                  |
| EML | InP/ZnSe/ZnS QD (Red)      | decane, cyclohexylbenzene                 | 0.5%    | 14               |
| ETL | ZnMgO NP                   | isopropanol                               |         |                  |
| HTL | TFB                        | chlorobenzene                             |         |                  |
| EML | CdSe/ZnS QD (Red)          | decane, cyclohexylbenzene                 | 9.32%   | 15               |
| ETL | ZnO NP                     | ethanol                                   |         |                  |
| HTL | TFB, PVK                   | chlorobenzene                             |         |                  |
| EML | InP/ZnSeS QD (Red)         | octane, cyclohexylbenzene                 | 0.02%   | 16               |
| ETL | ZnMgO NP                   | ethanol                                   |         |                  |
| HTL | TFB, PVK                   | chlorobenzene                             |         |                  |
| EML | InP/ZnSeS QD (Green)       | octane, cyclohexylbenzene                 | 0.14%   | 16               |
| ETL | ZnMgO NP                   | ethanol                                   |         |                  |
| HTL | TFB, PVK                   | chlorobenzene                             |         |                  |
| EML | ZnTeSe/ZnSeS/ZnS QD (Blue) | octane, cyclohexylbenzene                 | 0.12%   | 16               |
| ETL | ZnMgO NP                   | ethanol                                   |         |                  |
| HTL | TFB                        | chlorobenzene                             |         |                  |
| EML | CdZnSe/ZnS QD (Red)        | indane, cyclohexylbenzene                 | 0.20%   | 17               |
| ETL | ZnO NP                     | ethanol                                   |         |                  |
| HTL | Poly-TPD                   | chlorobenzene                             |         |                  |
| EML | CdZnSe/ZnS QD (Red)        | indane, cyclohexylbenzene                 | 1.90%   | 17               |
| ETL | ZnO NP                     | ethanol                                   |         |                  |
| HTL | PVK                        | chlorobenzene                             |         |                  |
| EML | CdZnSe/ZnS QD (Red)        | indane, cyclohexylbenzene                 | 17.0%   | 17               |
| ETL | ZnO NP                     | ethanol                                   |         |                  |
| HTL | PF8CZ, FLCZ-V              | chlorobenzene                             |         |                  |
| EML | CdSe/ZnS QD (Blue)         | decahydronaphthalene, cyclohexylbenzene   | 9.2%    | 18               |
| ETL | ZnMgO NP                   | ethanol                                   |         |                  |
| HTL | TFB                        | chlorobenzene                             |         |                  |
| EML | CdSe/ZnS QD (Red)          | octane, cyclohexylbenzene                 | N/A     | 19               |
| ETL | ZnO NP                     | <i>n</i> -butanol, methanol, chloroform   |         |                  |
| HTL | TFB                        | chlorobenzene                             |         |                  |
| EML | CdSe/ZnS QD (Green)        | octane, cyclohexylbenzene                 | N/A     | 19               |
| ETL | ZnO NP                     | <i>n</i> -butanol, methanol, chloroform   |         |                  |
| HTL | TFB                        | N/A                                       | 16.6%   | 20               |

|     |                         |                                                          |       |    |
|-----|-------------------------|----------------------------------------------------------|-------|----|
| EML | CdSe/ZnSe QD (Red)      | decane, cyclohexylbenzene                                |       |    |
| ETL | ZnO NP                  | <i>n</i> -octanol, <i>n</i> -butanol                     |       |    |
| HTL | PDA-FLCZ                | chlorobenzene                                            |       |    |
| EML | CdSe/ZnS QD (Red)       | cyclohexylbenzene, decahydronaphthalene                  | 15.28 | 21 |
| ETL | ZnMgO NP                | N/A                                                      |       |    |
| HTL | TFB                     | N/A                                                      |       |    |
| EML | N/A (Red)               | decane, cyclohexylbenzene                                | 18.4% | 22 |
| ETL | ZnO NP                  | N/A                                                      |       |    |
| HTL | TFB                     | N/A                                                      |       |    |
| EML | N/A (Green)             | decane, cyclohexylbenzene                                | 13.3% | 22 |
| ETL | ZnO NP                  | N/A                                                      |       |    |
| HTL | TFB                     | N/A                                                      |       |    |
| EML | N/A (Blue)              | decane, cyclohexylbenzene                                | 5.6%  | 22 |
| ETL | ZnO NP                  | N/A                                                      |       |    |
| HTL | TFB                     | N/A                                                      |       |    |
| EML | CdZnSe/ZnS QD (Red)     | octane, 1-cyclohexyl-ethanol,<br><i>n</i> -butyl acetate | 19.3% | 23 |
| ETL | ZnMgO NP                | ethanol                                                  |       |    |
| HTL | TFB                     | N/A                                                      |       |    |
| EML | N/A (Green)             | octane, 1-cyclohexyl-ethanol,<br><i>n</i> -butyl acetate | 18.0% | 23 |
| ETL | ZnMgO NP                | ethanol                                                  |       |    |
| HTL | TFB                     | N/A                                                      |       |    |
| EML | ZnCdSe/ZnS QD (Red)     | octane, 1-cyclohexyl-ethanol,<br><i>n</i> -butyl acetate | 4.4%  | 23 |
| ETL | ZnMgO NP                | ethanol                                                  |       |    |
| HTL | TFB                     | N/A                                                      |       |    |
| EML | N/A (Cd)                | octane, 1-cyclohexyl-ethanol,<br><i>n</i> -butyl acetate | 21.0% | 24 |
| ETL | ZnMgO NP                | ethanol                                                  |       |    |
| HTL | TFB                     | chlorobenzene                                            |       |    |
| EML | CdSe/ZnS QD (Red)       | propylene glycol monomethyl ether acetate                | 22.0% | 11 |
| ETL | ZnMgO NP                | ethanol                                                  |       |    |
| HTL | TFB                     | chlorobenzene                                            |       |    |
| EML | CdSe/ZnS QD (Green)     | propylene glycol monomethyl ether acetate                | 15.0% | 11 |
| ETL | ZnMgO NP                | ethanol                                                  |       |    |
| HTL | TFB                     | chlorobenzene                                            |       |    |
| EML | CdSe/ZnS QD (Blue)      | propylene glycol monomethyl ether acetate                | 12.0% | 11 |
| ETL | ZnMgO NP                | ethanol                                                  |       |    |
| HTL | PVK                     | anisole                                                  |       |    |
| EML | InP/ZnSe/ZnS QD (Green) | toluene                                                  | 0.15% | 25 |
| ETL | ZnO NP                  | 1-butanol                                                |       |    |
| HTL | PVK                     | cyclopentanone                                           |       |    |
| EML | InP/ZnSe/ZnS QD (Green) | toluene                                                  | 1.0%  | 25 |
| ETL | ZnO NP                  | 1-butanol                                                |       |    |
| HTL | PVK:TCTA                | anisole                                                  | 1.0%  | 26 |
| EML | CdSe/ZnS QD (Red)       | toluene                                                  |       |    |

|     |                         |                                           |       |    |
|-----|-------------------------|-------------------------------------------|-------|----|
| ETL | ZnO NP                  | N/A                                       |       |    |
| HTL | TCTA                    | physical vapor deposition                 |       |    |
| EML | InP/ZnSe/ZnS QD (Green) | propylene glycol monomethyl ether acetate | 2.0%  | 12 |
| ETL | ZnO NP                  | ethanol                                   |       |    |
| HTL | TCTA                    | physical vapor deposition                 |       |    |
| EML | InP/ZnSe/ZnS QD (Green) | diethylene glycol monobutyl ether acetate | 2.88% | 27 |
| ETL | ZnO NP                  | N/A                                       |       |    |
| HTL | NPB                     | physical vapor deposition                 |       |    |
| EML | CdSe/CdS/ZnS QD (Red)   | nonane, cyclohexylbenzene                 | 0.55% | 28 |
| ETL | ZnO                     | magnetron sputtering                      |       |    |

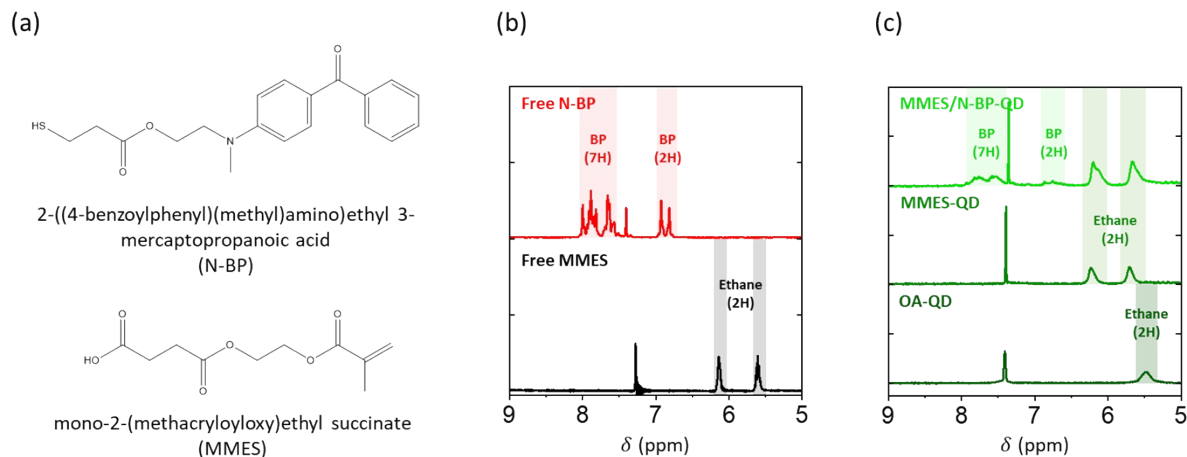

**Fig. S1** (a) Chemical structures of N-BP and MMES. (b)  $^1\text{H}$  NMR spectra of free MMES and N-BP acquired using  $\text{CDCl}_3$  as the NMR solvent.  $^1\text{H}$  NMR spectra of MMES ( $\delta$  6.23–6.05 (m, 1H), 5.73–5.55 (m, 1H), 4.43–4.16 (m, 4H), 2.69–2.53 (m, 4H), 2.06–1.79 (m, 3H)) and N-BP ( $\delta$  8.19–7.31 (m, 7H), 7.00–6.70 (m, 2H), 4.59–4.29 (t, 2H), 3.98–3.68 (t, 2H), 3.33–3.13 (s, 3H), 3.04–2.57 (m, 2H), 1.87–1.47 (m, 2H)), acquired at 298 K. (c)  $^1\text{H}$  NMR spectra of the OA-QDs, MMES-QDs and MMES/N-BP-QDs acquired using  $\text{CDCl}_3$  as the NMR solvent.  $^1\text{H}$  NMR data for the OA-QDs ( $\delta$  5.81–5.20 (2H, s), 2.75–1.98 (2H, d), 1.83–0.76 (25H, m)), MMES-QDs ( $\delta$  6.23–6.05 (m, 1H), 5.73–5.55 (m, 1H), 4.43–4.16 (m, 4H), 2.69–2.53 (m, 4H), 2.06–1.79 (m, 3H)) and N-BP ( $\delta$  8.19–7.31 (m, 7H), 7.00–6.70 (m, 2H), 4.59–4.29 (t, 2H), 3.98–3.68 (t, 2H), 3.33–3.13 (s, 3H), 3.04–2.57 (m, 2H), 1.87–1.47 (m, 2H)), measured at 298 K.

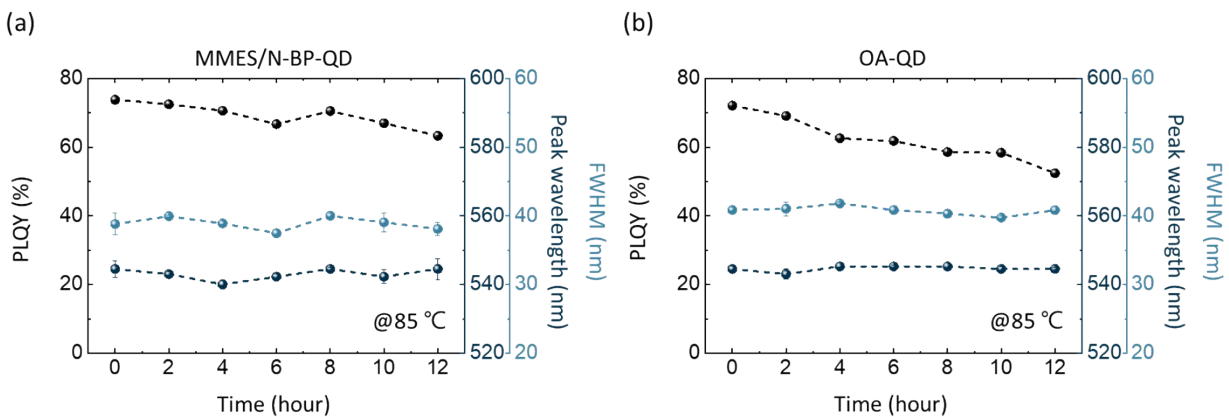

**Fig. S2** Luminescence characteristics retention (PLQY, peak wavelength and FWHM) of the (a) MMES/N-BP-QD and (b) OA-QD ink stored at 85 °C for 12 h. Error bar represents the standard deviation.

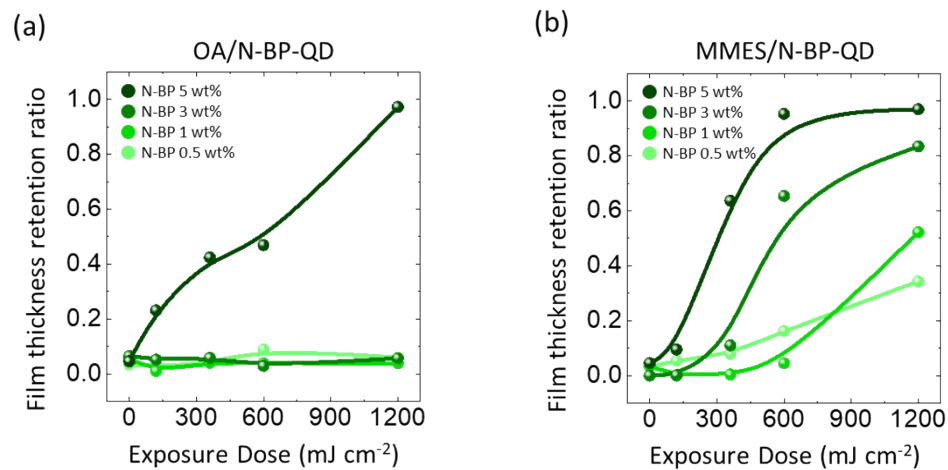

**Fig. S3** The film thickness retention ratio (FRR) graph of (a) OA/N-BP QD and (b) MMES/N-BP QD cases after irradiation under the ambient condition.

(a)

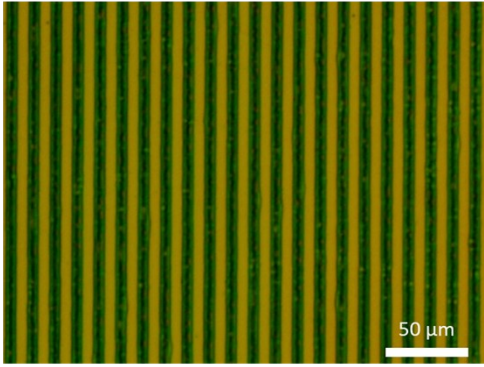

(b)

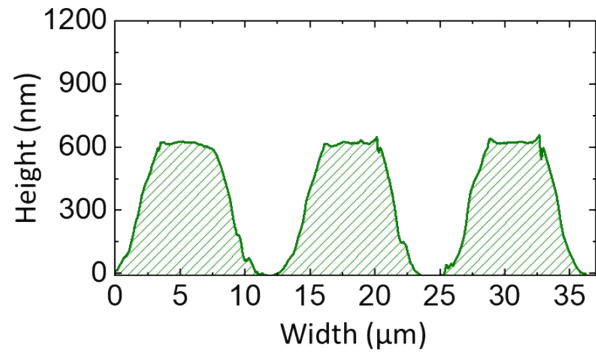

**Fig. S4** (a) OM image and (b) AFM height profile of the 600 nm line patterns

## References

1. A. Qualtieri, L. Martiradonna, T. Stomeo, M. T. Todaro, R. Cingolani, M. De Vittorio, *Microelectron. Eng.*, 2009, **86**, 1127.
2. E. Lee, S. Kan, C. Hotz, J. Yurek, Z. Luo, H. Kim, J. Yamanaga and A. Carpenter, *SID Symp. Dig. Tech Pap.*, 2017, **48**, 984-987.
3. S. Yue, *SID Symp. Dig. Tech. Pap.*, 2018, **49**, 672.
4. S. Lee and C. Lee, *Polym. Adv. Technol.*, 2019, **30**, 749.
5. B. Zhao, X. Zhang, X. Bai, H. Yang, S. Li, J. Hao, H. Liu, R. Lu, B. Xu and L. Wang, *Sci. China Mater.*, 2019, **62**, 1463.
6. C.-J. Chen, K.-A. Chen and R.-K. Chiang, *SID Symp. Dig. Tech. Pap.*, 2021, **52**, 884.
7. K.-P. Chang, C.-J. Wu, C.-W. Lo, Y.-S. Lin, C.-C. Yen, D.-S. Wu, *Mater. Sci. Semicond. Process.*, 2022, **148**, 106790.
8. S. Myeong, B. Chon, S. Kumar, H.-J. Son, S. O. Kang and S. Seo, *Nanoscale Adv.*, 2022, **4**, 1080.
9. B. B. Kim, S. Kumar, B. Chon, H.-J. Son, S. O. Kang and S. Seo, *Nanoscale*, 2023, **15**, 17473.
10. T.-W. Jang, C.-T. Lin and H.-S. Chen, *SID Symp. Dig. Tech. Pap.*, 2023, **54**, 1745.
11. D. Hahm, J. Park, I. Jeong, S. Rhee, T. Lee, C. Lee, S. Chung, W. K. Bae and S. Lee, *ACS Appl. Mater. Interfaces*, 2020, **12**, 10563-10570.
12. P. Xiao, J. Ma, Z. Zhang, Y. Zou, H. Luo, J. Guan, J.-r. Zhang, L. Zhou, W. Hou, P. Zhang, D. V. Talapin and Y. Wang, *ACS Nano*, 2025, **19**, 14509-14520.4.
13. P. Yang, L. Zhang, D. J. Kang, R. Strahl and T. Kraus, *Adv. Opt. Mater.*, 2020, **8**, 1901429.
14. M. Fu, J. J. Santaella, S. D. Evans and K. Critchley, *ACS Appl. Mater. Interfaces*, 2025, **17**, 22952.
15. H. Tang, S. Jia, S. Ding, P. Liu, J. Ma, X. Xiao, X. Qu, H. Liu, H. Yang, B. Xu, W. Chen, G. Li, Z. Pikramenou, C. Anthony, K. Wang and X. W. Sun, *ACS Appl. Electron. Mater.*, 2021, **3**, 3005.
16. S. Zhan, Y.-H. Suh, X.-B. Fan, J. Yang, L. Ni, J.-W. Jo, S. Lee, Y. Kim, H. W. Choi, S.-M. Jung, D.-W. Shin and J. M. Kim, *J. Soc. Inf. Disp.*, 2022, **30**, 1133.
17. X. Xiong, C. Wei, L. Xie, M. Chen, P. Tang, W. Shen, Z. Deng, X. Li, Y. Duan, W. Su, H. Zeng and Z. Cui, *Org. Electron.*, 2019, **73**, 247.
18. L. Xie, J. Shi, T. Wang, Q. Li, Y.-Q.-Q. Yi, Q. Zhang, Y. Liu, W. Su, B. S. Bae, D. C. Onwudiwe, W. Lei, Z. Cui and C. K. Luscombe, *ACS Appl. Mater. Interfaces*, 2024, **16**, 49563.
19. Y. Liu, F. Li, X. Xie, W. Chen, Z. Xu, C. Zheng, H. Hu and T. Guo, *SID Symp. Dig. Tech. Pap.*, 2017, **47**, 1715.
20. C. Xiang, L. Wu, Z. Lu, M. Li, Y. Wen, Y. Yang, W. Liu, T. Zhang, W. Cao, S.-W. Tsang, B. Shan, X. Yan and L. Qian, *Nat. Commun.*, 2020, **11**, 1646.
21. G. Qiu, Y.-Q.-Q. Yi, L. Xie, F. Su, T. Wang, W. Su and Z. Cui, *Sci. China Mater.*, 2024, **67**, 205.
22. L. Xie, Q. Li, Y.-Q.-Q. Yi, G. Qiu, O. E. Fayemi, X. Mu, Z. Ma, P. Tang, Y. Liu, W. Su, W. Lei and Z. Cui, *Chem. Eng. J.*, 2023, **477**, 146789.
23. S. Jia, H. Tang, J. Ma, S. Ding, X. Qu, B. Xu, Z. Wu, G. Li, P. Liu, K. Wang and X. W. Sun, *Adv. Opt. Mater.*, 2021, **9**, 2101069.
24. S. Jia, P. Liu, J. Ma, X. Qu, H. Tang, D. Li, J. Tang, Z. Wang, G. Li, K. Wang, X. Yang, W. Xu and X. W. Sun, *J. Soc. Inf. Display*, 2022, **30**, 574.
25. H. B. Kim, J. I. Yoo, S. C. Kang and J. K. Song, *Small*, 2024, **20**, 2304051.
26. S. -H. Lee, H.-B. Kim, J.-B. Kim, E.-Y. Choi and J.-K. Song, *Opt. Mater.*, 2025, **159**, 116692.
27. S. W. Jeong, J. H. Park, C. Kiguye, J. Jeong, J. Y. Park, D. Y. Kim, B. G. Jeong, D. R. Whang and J. Y. Kim, *Adv. Opt. Mater.*, 2025, **13**, 2500413.
28. H. Li, Y. Q. Duan, Z. Shao, G. Zhang, H. Li, Y. A. Huang and Z. Yin, *Adv. Mater. Technol.*, 2020, **5**, 2000401.
